# Supplementary material for: Letting the World See through Your Eyes: Using Photovoice to Explore the Role of Technology in Physical Activity for Adolescents Living with Type 1 Diabetes
Source: MDPI journal article supplement (doi:10.3390/ijerph19106315), 2022-05-23
Supplement: s1 [file s1]

## **Supplementary Materials**

**Letting the World See Through Your Eyes: Using Photovoice to Explore the Role of  
Technology in Physical Activity for Adolescents Living with Type 1 Diabetes**

**Diane Morrow <sup>1,\*</sup>, Alison Kirk <sup>2</sup>, Fiona Muirhead <sup>2</sup> and Marilyn Lennon <sup>1</sup>**

This data is submitted to provide evidence of the coding process using photovoice and thematic analysis with co-production techniques as described in the methods section of the paper.

# Coding analysis processes - photovoice

1. **Initial coding by researcher** – margin notes to discuss with co-researchers, also serving to train co-researchers in “what do codes look like?”.
2. **Co-production – analysis with participants.**

Emailing or Zoom call with participants, discussing codes with participants with the following:

- P Describe your photo
- H What is happening in the photo?
- O Why take a photo Of this?
- T What does this photo Tell us?
- O How can this photo provide Opportunity to improve an experience?

*Example on slide 4 – of first order coding, labelling with participants over video conferencing.*

3. **Second cycle of coding, with assistance from memoing - Research journal / logbook**

Observation Notes – written whilst talking on Zoom, and whilst familiarisation with data

Theoretical Notes – hunches, connections, interpretations, critiques – (all in reflexive journal).

Listening carefully to audio/video with participants.

4. **Research team discussion** – Sharing 100% of data to discuss coding process and agreements – sharing data and Nvivo maps.

Informal note taking – during participatory co-researcher data analysis. In manuscript of paper, see lines 194-198

10/2 25/3/20

Photo 3: Exercise effects for hours + 48hrs  
 Parental sleep disruption  
 Danger of nocturnal hypo  
 Exhaustion (Parent)  
 Remote monitoring helps with fear  
 - sends alarms.

Limitation of tech - basal suspend not  
 Cam, Pump algorithm  
 Reliance on tech / risk of it failing

Photo 4: Limitation  
 Type of sport - pump off due to not waterproof  
 Gap in data - uncertainty when RA  
 Reliance on data  
 Parental vigilance and burden  
 Parent educate / train others, others don't  
 others fear T2D  
 Parent enable participation.  
 Judgement from others

Photo 5: Be more aware of hidden disabilities  
 Others not fully aware.  
 facilities offering space

Photo 6: Assumptions from others / Judgement from others  
 Disappointment, anger  
 Frustration, exhausting, educating others.  
 Ignorance.  
 Wider society require more education.

Participant 6 Zoom Meeting 3/4/20  
 child:

Photo 1: Popcorn bug - "annoying"  
 mm: overwhelming  
 noisy, lights up } Technology  
 Cam alarm  
 other people get noisy, curious  
 Frustrating to educate  
 not easy to explain

Photo 2: Reliant on Tech / alarm  
 reduces worry - less scared  
 Boost confidence.

Photo 3: Couldn't be bothered  
 needs attention / focus - want to have fun  
 new sports / experimenting / basal insulin  
 Guess and see.  
 Confident with support of parent.

Photo 5: Like exercise / frequent hypo  
 need glucose + food.  
 really hungry.  
 Effects of hypols.  
 prevent hypols.  
 Tech doesn't

4: helps understand it can be hard to  
 deal with all the time  
 Painful / it hurts.  
 hate it, he doesn't want to do

Online Discussion.  
 25/3/20  
 Participant 2.

psychosocial: frustr  
 ang  
 up

SHOWED.  
 what do you See Happening  
 what Happened  
 How does this relate to Our lives  
 Why does this Happen  
 How could this image Educate others?  
 What can we Do about it?

Photo 1

The image is the vehicle to  
 meanin communication (var)

Describe your Photo  
 what is Happening in your pic?  
 why did you take a picture of this?  
 what Does this picture Tell us about your life?  
 how can this picture provide Opportunities to us to

Athlete can  
 (invest ne  
 edu

Coding process continued onto next slide: using Nvivo, labelling and coding using a combination of participatory codes and non-participatory codes. See lines 206-215 in manuscript for deeper explanation.

Item

Explore

Coding

Classification

Workspace

Nodes

Search Project

| Name                            | Files | References |
|---------------------------------|-------|------------|
| benefits of technology - usabil | 36    | 70         |
| complexity and difficulty       | 32    | 46         |
| Emotional impact                | 65    | 134        |
| confidence through suppo        | 10    | 11         |
| parental burden in facilitati   | 14    | 14         |
| parental sleep disruption       | 15    | 15         |
| resilience & positivity         | 15    | 15         |
| teen negative emotions          | 19    | 19         |
| reliance and risk               | 40    | 74         |

sport camp offer kinship and edu

<Files\\7\\Photo\_2 (parent)> - 5 1 reference coded [95.76% Coverage]

Reference 1 - 95.76% Coverage

Theme 2: Dskate is an elite hockey camp for Type 1 Diabetics and I learned how to treat my Diabetes both on and off the ice along with making new friends.

## Nodes

| Name                                              | Files | References |
|---------------------------------------------------|-------|------------|
| benefits of technology - usability & psychosocial | 36    | 70         |
| complexity and difficulty                         | 32    | 46         |
| Emotional impact                                  | 65    | 134        |
| confidence through support                        | 10    | 11         |
| parental burden in facilitation                   | 14    | 14         |
| parental sleep disruption                         | 15    | 15         |
| resilience & positivity                           | 15    | 15         |
| teen negative emotions                            | 19    | 19         |
| reliance and risk                                 | 40    | 75         |

Drag selection here to code to a new node

## reliance and risk

References 1-2 - 41.50% Coverage

I didn't hear my pump alarm. Turns out I was extremely hypo.

<Files\\1\\Photo 5 voice (child)> - 5 2 references coded [90.80% Coverage]

References 1-2 - 90.80% Coverage

My cgm failed 4 days early and I didn't feel the hypo I had walking to the library with School. Luckily my Mum came with me and her spidey senses were working. She tested my blood sugar with a finger prick and treated the low. I felt very hungry and thirsty and could not concentrate on what the class were doing.

<Files\\1\\Photo 6 voice (child)> - 5 2 references coded [88.89% Coverage]

References 1-2 - 88.89% Coverage

My blood glucose sensor failed half way through the week. On a good note though peeling off my CGM feels amazing after having it stuck to my body for a few days. The CGM can annoy me and the tape makes me itchy. It feels like luxury when I am free of it.

<Files\\10\\Photo 1(parent and child)> - 5 4 references coded [91.73% Coverage]

References 1-2 - 67.95% Coverage

We love our son's Tandem pump however was massively stressed when we got this malfunction

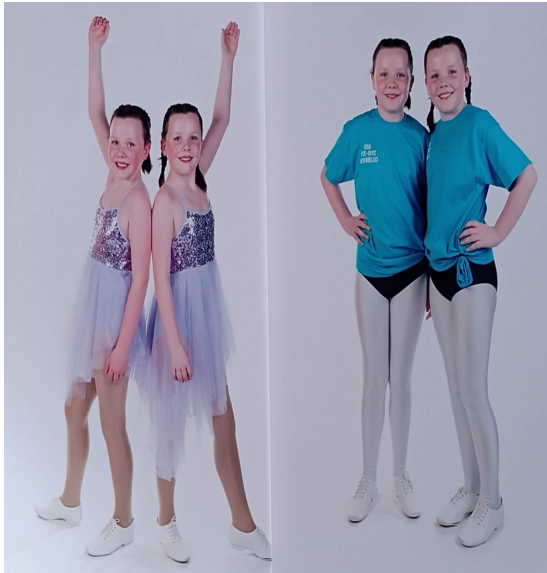

## Example of pre coding labels in red and collaborative coding/changes in blue

Submitted narrative data:

Teen: Had dress rehearsal for my Dance show. My mum takes care of my diabetes when I'm dancing so I get to enjoy the show just as much as my twin sister Annalisa. The photographer posed us in such a way my pump doesn't show in the photos as I get very self conscious around new people. I spend most of the dance show without my pump on as I'm moving about too much and have lots of dress changes. I snack on sugar/carb free foods to keep my energy up but avoid high blood sugars as I am on and off stage for 3 hours.

Mum: Dress rehearsal and show is manic. It takes days of planning and I often don't sleep the night before making sure I don't just have all the dance outfits packed but that I have snacks, hypo treatment, all things diabetes and then some more just for good luck. There's usually always something I have forgotten. I often feel like I'm drowning in diabetes supplies but I never let the girls see me stressing. It's happy faces all round so they enjoy showtime. I try keeping \* sugars perfect for dance shows so she can enjoy it like everyone else and that usually means her pump is on and off a few times that night. She is usually jumping about all over the place and doesn't notice me attaching and detaching it.

**Initial researcher codes/ co-researcher changes:**

**Parental gatekeeping– diabetes support whilst teen is active**

**Hiding pump – visibility of technology/identity**

**Planning ahead to enable physical activity – Parent has all the burden to help teen**

**Trying to prevent risk – preventing risk and relying on the tech**

**Parent easing teen burden of the condition – I try to use the tech without it disrupting**



Participant 1  
(Male adolescent, Age 9)

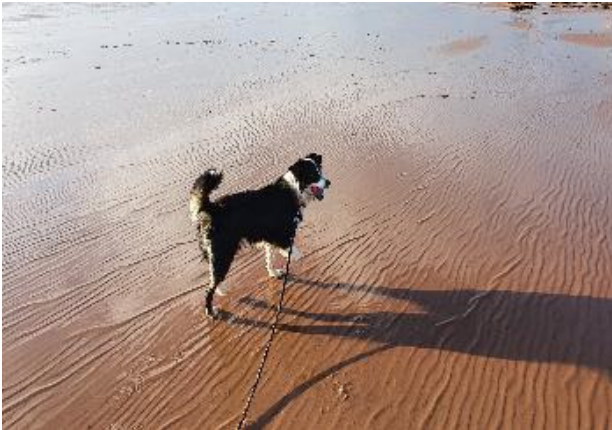

I went for a walk with my Dog when suddenly my pump alarm told me I was going Low. I am so lucky to have a CGM and a new dog.

**Analysis  
codes:**

**1 Benefits– alarm/alert**

Parent agrees

**2 Hypoglycaemia whilst walking**

Hypo whilst active

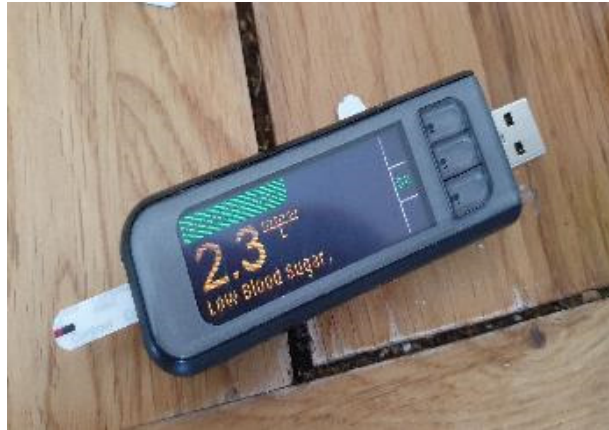

Feeling super hungry after a long walk on the beach. I didn't hear my pump alarm. Turns out I was extremely hypo.

**Analysis  
codes:**

**1 Technology alerts**

**2 Alarms not always audible**

**3 Extreme hunger whilst hypo**

Change alerts?

Reliance on alerts

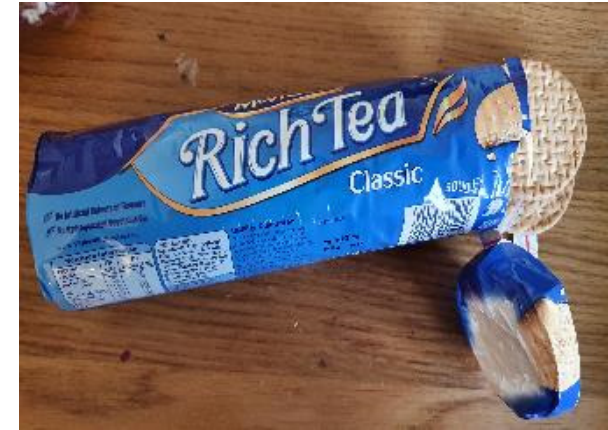

Yesterday I had a "Snackccident" at School after a torturous gym session. I felt extremely tired and hungry. My blood sugars were low but not hypo. I forgot to take insulin. My classroom assistant was not happy I stole the snacks.

**Analysis  
codes:**

**1 Extreme hunger whilst hypo**

**2 Forgetfulness**

When I'm not there / moving away from me



# Nvivo coding – classifying data, naming themes

The screenshot displays the Nvivo software interface. On the left, the 'Quick Access' pane shows 'Files', 'Nodes', and 'Memos'. Below it, the 'Data' pane shows a list of files numbered 1 through 20, with file 18 selected. The main 'Nodes' pane on the right shows a hierarchical list of nodes. The 'Emotional impact' node is selected and highlighted in blue. The 'Nodes' list includes the following nodes and their associated file and reference counts:

| Name                                              | Files     | References |
|---------------------------------------------------|-----------|------------|
| benefits of technology - usability & psychosocial | 32        | 34         |
| communication & immediate support                 | 9         | 9          |
| ease of psychological burden                      | 4         | 4          |
| passivity & glanceability                         | 22        | 23         |
| complexity and difficulty                         | 26        | 26         |
| transitions from parent                           | 2         | 2          |
| Uncertainty and PA induced hypox                  | 13        | 14         |
| Visibility of T1                                  | 4         | 4          |
| <b>Emotional impact</b>                           | <b>55</b> | <b>60</b>  |
| confidence through support                        | 10        | 10         |
| parental burden in facilitation                   | 14        | 14         |
| parental sleep disruption                         | 15        | 15         |
| resilience & positivity                           | 15        | 15         |
| teen negative emotions                            | 19        | 19         |
| reliance and risk                                 | 29        | 31         |
| Tech fails & severe life risk                     | 35        | 38         |
| trust & vigilance                                 | 4         | 5          |

# Nvivo coding – classifying data, naming themes

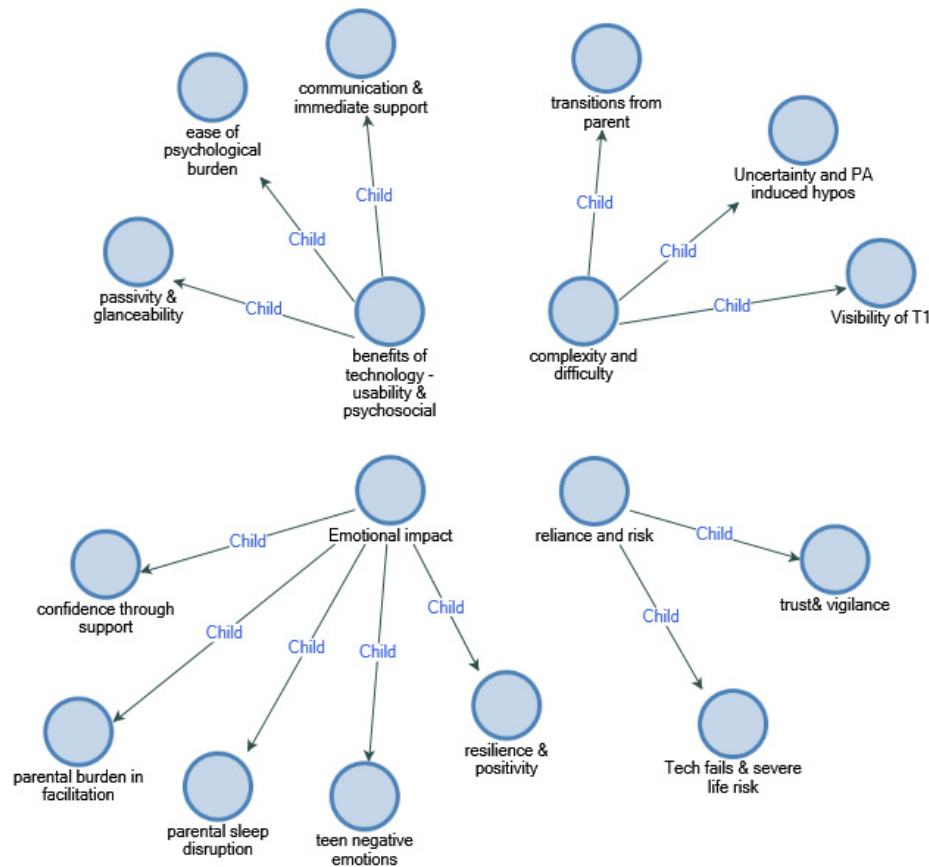

NVivo map showing movement from sub-theme to higher order themes, after 2<sup>nd</sup> cycle of coding.

Practices involved research team congruence and agreement across all data, sharing all images and narratives.
